# Supplementary material
Source: PubMed Central journal article supplement (PMC2217643)
Supplement: plntcell_tpc.107.054288_1.pdf [file plntcell_tpc.107.054288_1.pdf]

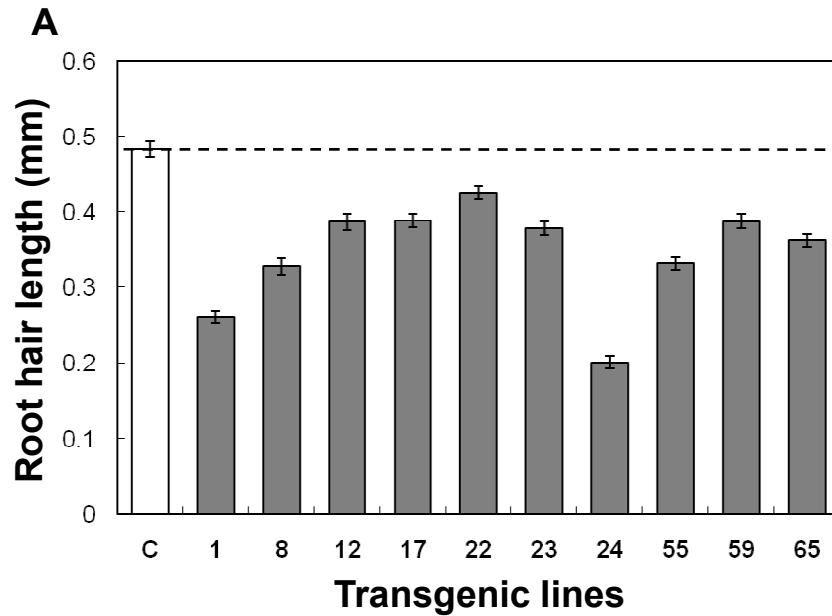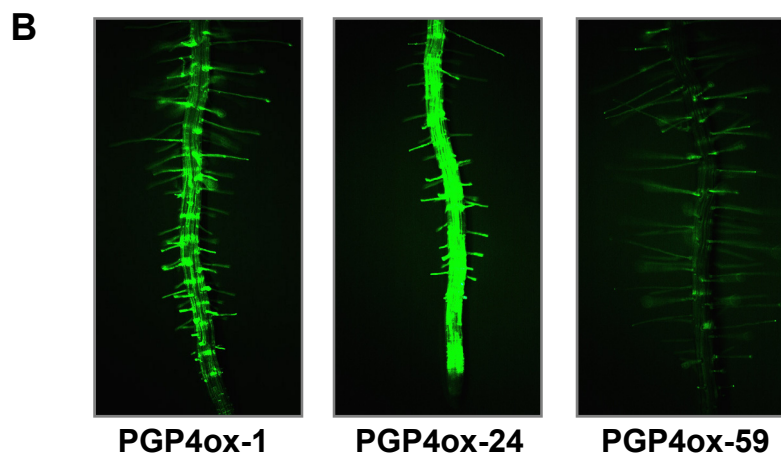

**Supplemental Figure 1.** Root Hair Length of  $P_{E7}:PGP4-YFP$  Lines.

(A) Independent  $P_{E7}:PGP4-YFP$  transformant lines were randomly selected, and root hair length was compared with that of the  $P_{E7}:YFP$  control line (C). The horizontal broken line indicates the control level. Bars are S.E. (N=169-180, average=178)

(B) The expression level of PGP4 is proportional to the reduction of root hair elongation in the transformants. The fluorescence from PGP4-YFP fusion protein was observed by excitation at 488 nm and emission at 543 nm which is shown as green here.

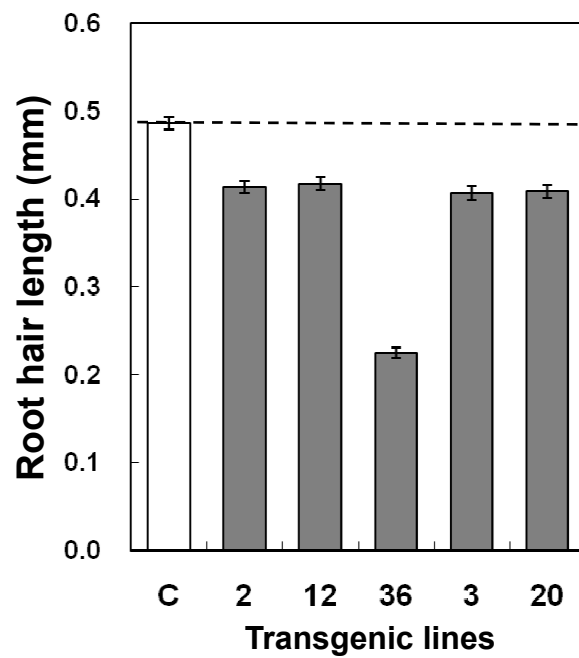

**Supplemental Figure 2.** Root Hair Length of  $P_{35S}:PGP4-YFP$  Lines.

Root hair length of five independent  $P_{35S}:PGP4-YFP$  transgenic lines was compared with that of the  $P_{35S}:YFP$  control line (C). The horizontal broken line indicates the control level. Bars are S.E. (N=342)

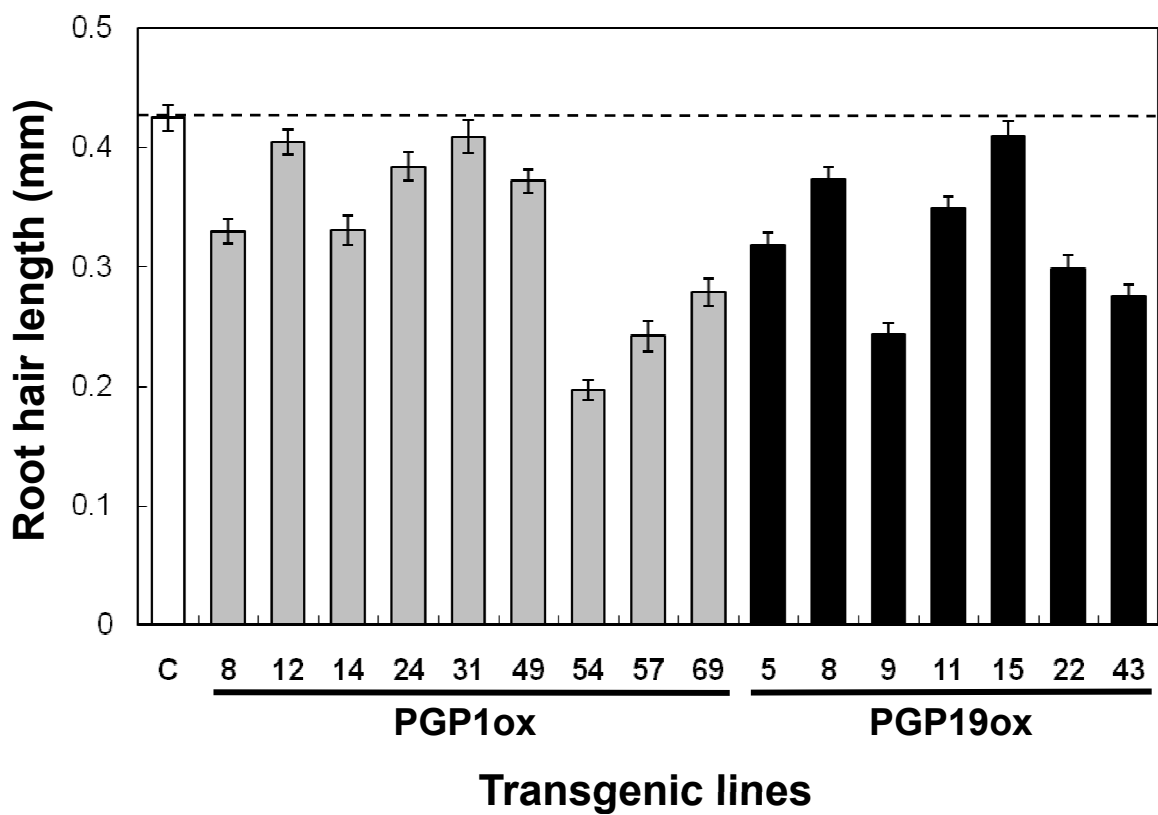

**Supplemental Figure 3.** Root Hair Length of  $P_{E7}:PGPI-YFP$  (PGP1ox) and  $P_{E7}:PGP19-YFP$  (PGP19ox) Lines.

Root hair length of independent transgenic lines was compared with that of the  $P_{E7}:YFP$  control line (C). The horizontal broken line indicates the control level. Bars are S.E. (N=117-180, average=170)

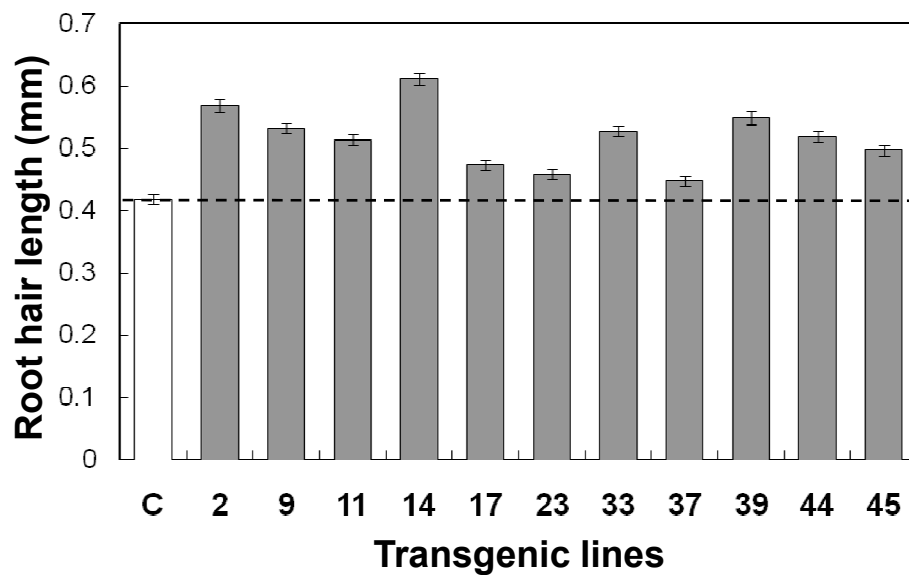

**Supplemental Figure 4.** Root Hair Length of  $P_{E7}:AUX1-YFP$  Lines.

Root hair length of independent  $P_{E7}:AUX1-YFP$  transgenic lines was compared with that of the  $P_{E7}:YFP$  control line (C). The horizontal broken line indicates the control level. Bars are S.E. (N=180-333, average=210)



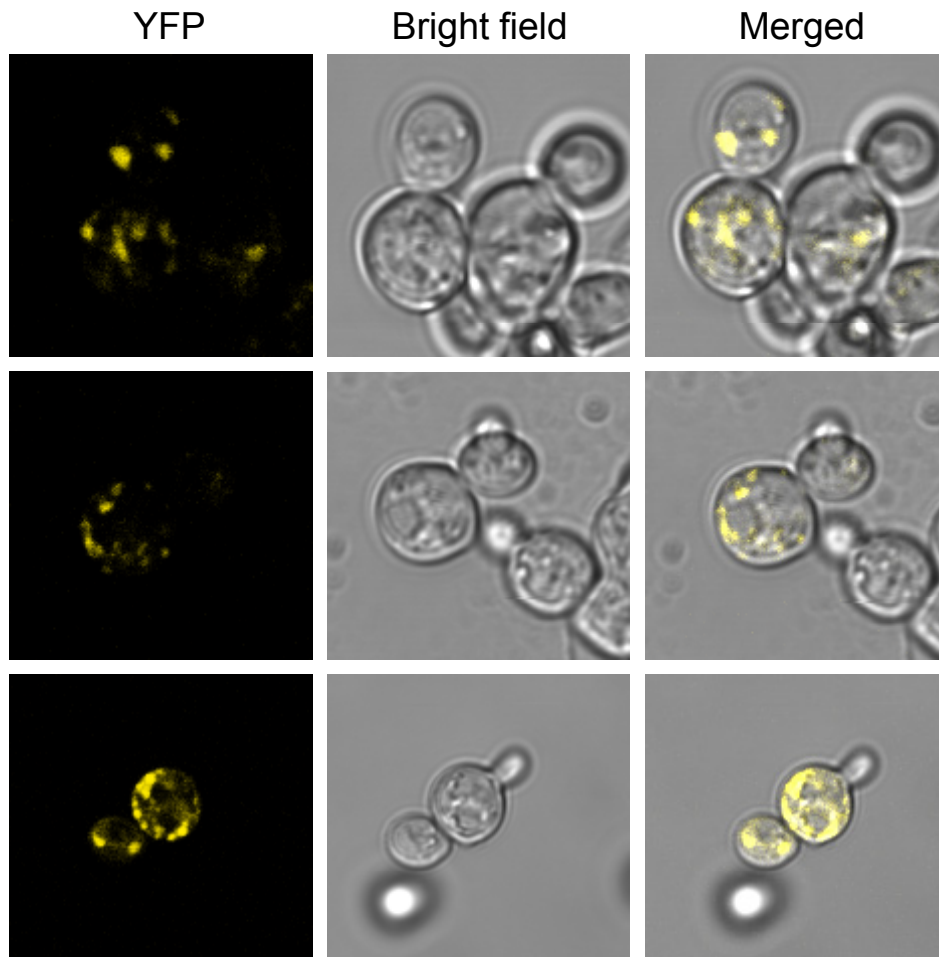

**Supplemental Figure 6.** PGP4-YFP Localizes in the Internal Compartments in Yeast Cells.

Confocal microscopy images of yellow fluorescence (YFP) from PGP4-YFP, brightfield images of the same cells, and the merged images. The  $P_{GAL1}$ -PGP4-YFP construct was introduced into the aux in-sensitive *Saccharomyces cerevisiae* strain  $\Delta yap1-1$  (Prusty et al., 2004).
